# Supplementary figures and images for: Nanostructured Porous Silicon for Bone Tissue Engineering: Kinetics of Particle Degradation and Si-Controlled Release
Source: MDPI journal article supplement (doi:10.3390/jfb14100493), 2023-09-30

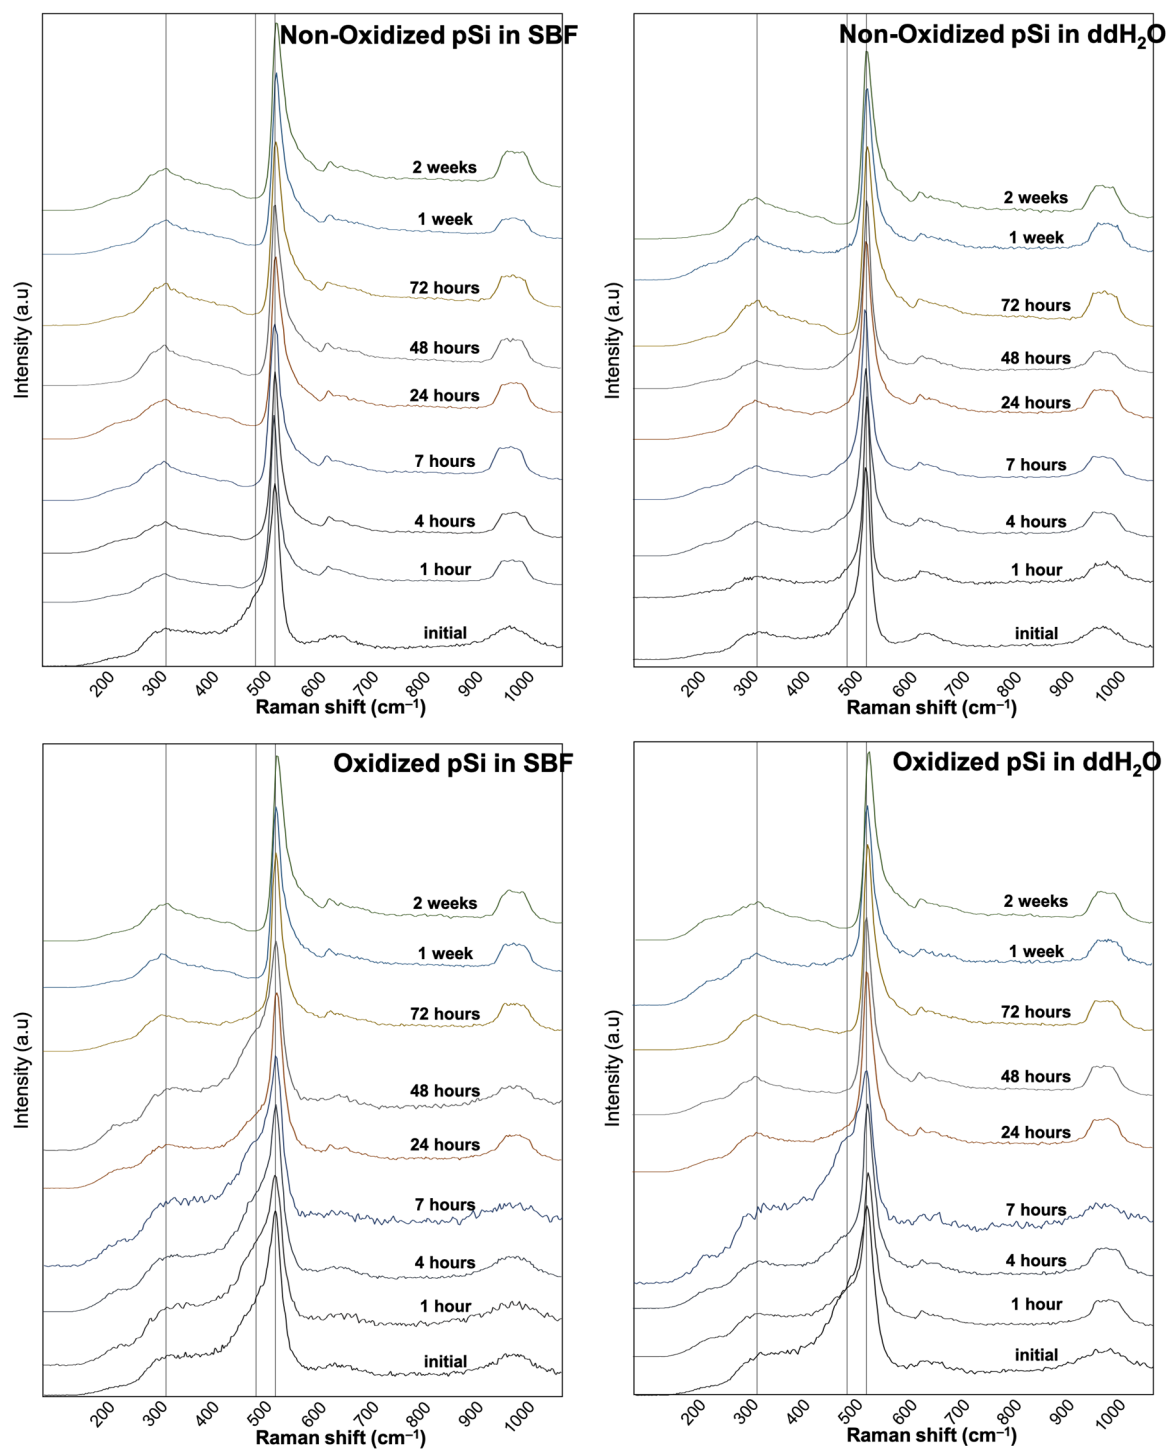

**Figure S1:** Raman spectra and their evolution over time.

Supplement: s1 [file s1]
